# Supplementary material for: Effect of optimal antenatal care on maternal and perinatal health in Ethiopia
Source: Frontiers journal article supplement (doi:10.3389/fped.2023.1120979), 2023-02-07
Supplement: Data_Sheet_1.PDF [file Data_Sheet_1.PDF]

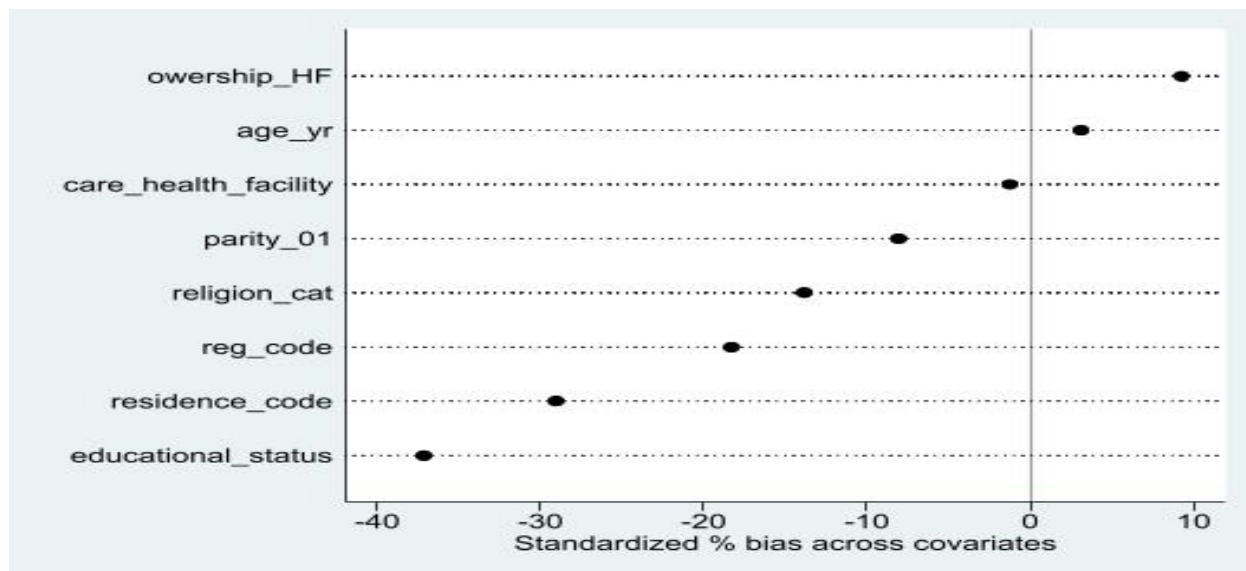

**Annex 1:** Balance check of propensity score across covariates before matching

(A). Ownership\_HF(ownership of health facility), (B) age\_yr (maternal age), (C) care\_health\_facility (type of health facility), (D) parity\_01(maternal parity), (E) religion\_cat(religion),(F) residence\_code(residence), (G) educational\_status(maternal educational status)

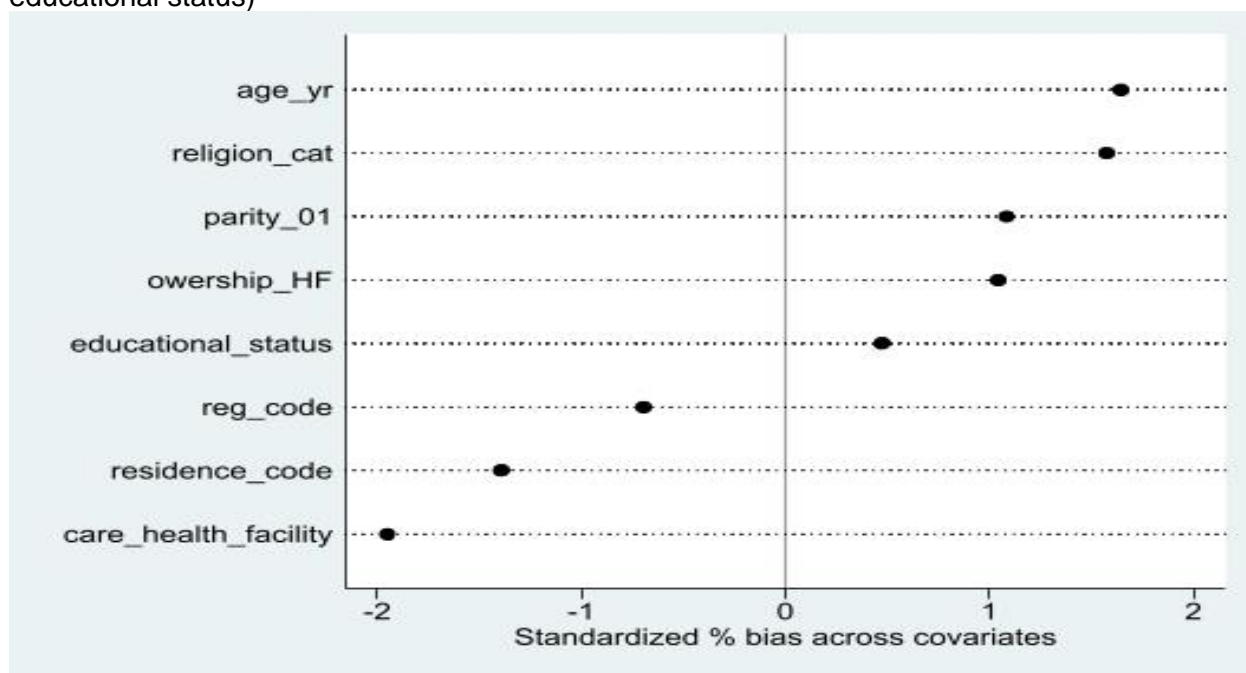

**Annex 2:** Balance check of propensity score across covariates after matching

(A). ownership\_HF (ownership of health facility), (B) age\_yr (maternal age), (C) care\_health\_facility (type of health facility), (D) parity\_01(maternal parity), (E) religion\_cat(religion),(F) residence\_code(residence), (G) educational\_status(maternal educational status)
